# Supplementary material for: Changes in Food Intake in Australia: Comparing the 1995 and 2011 National Nutrition Survey Results Disaggregated into Basic Foods
Source: MDPI journal article supplement (doi:10.3390/foods5020040), 2016-05-25
Supplement: s1 [file s1]

## Supplementary Material: Changes in Food Intake in Australia: Comparing the 1995 and 2011 National Nutrition Survey Results Disaggregated into Basic Foods

Bradley Ridoutt, Danielle Baird, Kathryn Bastiaans, Gilly Hendrie, Malcolm Riley, Peerasak Sanguansri, Julie Syrette and Manny Noakes

Table S1. Reported intake of basic foods (kg/person/year) by Australians in 1995 \*.

| Basic Food                      | Reporting Unit          | Males |       |       |       |       |       |       |       |
|---------------------------------|-------------------------|-------|-------|-------|-------|-------|-------|-------|-------|
|                                 |                         | 2–3   | 4–8   | 9–11  | 12–13 | 14–18 | 19–49 | 50–69 | 70+   |
| Fruit                           | Raw, edible portion     | 177.8 | 145.5 | 142.5 | 137.8 | 148.2 | 123.5 | 119.2 | 117.9 |
| Vegetables (incl. mushrooms)    | Raw, edible portion     | 44.6  | 59.8  | 79.5  | 103.4 | 129.6 | 132.5 | 137.0 | 117.9 |
| Edible seaweed                  | Dried                   | <0.01 | <0.01 | <0.01 | <0.01 | <0.01 | <0.01 | <0.01 | <0.01 |
| Meat                            | Raw, edible portion     | 25.2  | 37.4  | 52.7  | 62.0  | 84.3  | 96.2  | 75.6  | 60.1  |
| Seafood                         | Raw, edible portion     | 1.9   | 3.1   | 5.5   | 5.8   | 7.4   | 10.9  | 12.9  | 9.0   |
| Dairy products                  | Whole milk equivalent   | 219.6 | 197.0 | 215.0 | 269.9 | 263.1 | 200.1 | 157.5 | 139.8 |
| Eggs                            | Whole egg without shell | 4.7   | 7.0   | 8.1   | 10.1  | 11.4  | 10.7  | 10.1  | 8.2   |
| Grains                          | Whole grain equivalent  | 40.6  | 57.4  | 72.4  | 79.3  | 82.0  | 80.0  | 63.2  | 55.3  |
| Beans, peas and pulses          | Dried                   | 1.3   | 0.8   | 0.7   | 1.1   | 1.3   | 1.6   | 1.4   | 2.0   |
| Nuts and seeds                  | Dried                   | 0.7   | 1.3   | 1.6   | 1.3   | 0.9   | 2.6   | 1.9   | 1.2   |
| Sugar                           | Refined                 | 18.3  | 25.1  | 31.4  | 37.5  | 41.4  | 27.1  | 19.0  | 18.2  |
| Cocoa                           | Dried bean equivalent   | 1.2   | 1.1   | 1.4   | 1.9   | 1.8   | 1.0   | 0.5   | 0.3   |
| Vegetable oil (incl. margarine) | Refined oil             | 6.8   | 10.7  | 13.2  | 14.4  | 16.4  | 15.3  | 13.1  | 12.1  |
| Butter and ghee                 | Butter                  | 1.1   | 2.0   | 2.4   | 3.2   | 2.9   | 2.7   | 2.8   | 2.8   |
| Beer                            | Beer                    |       |       |       |       | 31.0  | 137.7 | 121.5 | 68.5  |
| Wine                            | Wine                    |       |       |       |       | 4.9   | 16.4  | 29.9  | 18.3  |

Table S1. Cont.

| Basic Food                      | Reporting Unit          | Females |       |       |       |       |       |       |       |
|---------------------------------|-------------------------|---------|-------|-------|-------|-------|-------|-------|-------|
|                                 |                         | 2–3     | 4–8   | 9–11  | 12–13 | 14–18 | 19–49 | 50–69 | 70+   |
| Fruit                           | Raw, edible portion     | 144.5   | 165.4 | 129.7 | 180.9 | 169.9 | 135.2 | 131.1 | 130.7 |
| Vegetables (incl. mushrooms)    | Raw, edible portion     | 44.6    | 58.3  | 75.8  | 106.7 | 104.4 | 120.9 | 128.2 | 117.1 |
| Edible seaweed                  | Dried                   | <0.01   | <0.01 | <0.01 | <0.01 | <0.01 | <0.01 | <0.01 | <0.01 |
| Meat                            | Raw, edible portion     | 22.4    | 33.6  | 42.4  | 61.9  | 62.8  | 61.1  | 53.4  | 45.9  |
| Seafood                         | Raw, edible portion     | 2.1     | 4.6   | 4.2   | 6.0   | 7.5   | 9.5   | 10.9  | 8.7   |
| Dairy products                  | Whole milk equivalent   | 202.7   | 162.5 | 186.9 | 199.7 | 198.2 | 174.7 | 169.0 | 151.0 |
| Eggs                            | Whole egg without shell | 4.9     | 6.4   | 8.1   | 7.9   | 7.6   | 9.2   | 7.8   | 8.0   |
| Grains                          | Whole grain equivalent  | 38.2    | 48.6  | 57.3  | 62.0  | 67.3  | 63.3  | 52.8  | 49.5  |
| Beans, peas and pulses          | Dried                   | 0.9     | 0.4   | 0.4   | 0.7   | 1.0   | 1.4   | 1.2   | 1.4   |
| Nuts and seeds                  | Dried                   | 1.0     | 1.5   | 1.2   | 0.9   | 1.9   | 2.3   | 1.8   | 0.8   |
| Sugar                           | Refined                 | 15.9    | 22.2  | 26.1  | 32.8  | 28.3  | 19.8  | 15.1  | 14.8  |
| Cocoa                           | Dried bean equivalent   | 0.9     | 1.1   | 1.6   | 1.7   | 2.1   | 1.1   | 0.7   | 0.3   |
| Vegetable oil (incl. margarine) | Refined oil             | 6.8     | 9.7   | 11.4  | 12.9  | 12.6  | 12.8  | 11.5  | 10.8  |
| Butter and ghee                 | Butter                  | 1.2     | 1.7   | 2.4   | 3.2   | 2.4   | 2.2   | 2.1   | 2.6   |
| Beer                            | Beer                    |         |       |       |       | 10.8  | 18.6  | 14.4  | 4.5   |
| Wine                            | Wine                    |         |       |       |       | 2.4   | 24.9  | 21.3  | 11.7  |

\* Basic foods are expressed as raw food equivalents (edible portion only), with cooking and processing factors applied where necessary.

Table S2. Reported intake of basic foods (kg/person/year) by Australians in 2011 \*.

| Basic Food                      | Reporting Unit          | Males   |       |       |       |       |       |       |       |
|---------------------------------|-------------------------|---------|-------|-------|-------|-------|-------|-------|-------|
|                                 |                         | 2–3     | 4–8   | 9–11  | 12–13 | 14–18 | 19–49 | 50–69 | 70+   |
| Fruit                           | Raw, edible portion     | 140.5   | 133.0 | 134.6 | 153.1 | 147.2 | 129.4 | 136.5 | 144.3 |
| Vegetables (incl. mushrooms)    | Raw, edible portion     | 47.0    | 72.3  | 89.3  | 119.1 | 124.5 | 132.7 | 132.3 | 125.6 |
| Edible seaweed                  | Dried                   | <0.01   | 0.01  | <0.01 | <0.01 | 0.03  | 0.05  | 0.02  | <0.01 |
| Meat                            | Raw, edible portion     | 32.5    | 44.1  | 55.7  | 84.0  | 93.6  | 100.3 | 94.3  | 78.6  |
| Seafood                         | Raw, edible portion     | 3.8     | 3.9   | 6.5   | 4.3   | 5.8   | 15.1  | 16.4  | 14.5  |
| Dairy products                  | Whole milk equivalent   | 184.0   | 180.0 | 182.9 | 242.9 | 224.1 | 211.5 | 182.0 | 168.7 |
| Eggs                            | Whole egg without shell | 3.6     | 7.5   | 7.1   | 8.7   | 11.6  | 11.7  | 12.6  | 13.2  |
| Grains                          | Whole grain equivalent  | 41.2    | 59.1  | 70.2  | 84.7  | 90.1  | 77.4  | 73.9  | 70.8  |
| Beans, peas and pulses          | Dried                   | 1.9     | 0.9   | 1.1   | 0.9   | 2.1   | 2.2   | 1.7   | 1.9   |
| Nuts and seeds                  | Dried                   | 0.7     | 1.2   | 1.5   | 1.1   | 1.7   | 3.5   | 4.5   | 2.5   |
| Sugar                           | Refined                 | 12.2    | 19.2  | 22.2  | 29.9  | 31.0  | 25.3  | 20.5  | 20.9  |
| Cocoa                           | Dried bean equivalent   | 0.9     | 1.4   | 2.1   | 3.2   | 2.1   | 1.4   | 1.5   | 1.4   |
| Vegetable oil (incl. margarine) | Refined oil             | 6.0     | 9.3   | 11.3  | 13.7  | 13.2  | 13.0  | 12.1  | 12.3  |
| Butter and ghee                 | Butter                  | 0.9     | 2.1   | 2.6   | 3.1   | 2.8   | 2.2   | 3.0   | 3.6   |
| Beer                            | Beer                    |         |       |       |       | 15.3  | 115.7 | 134.5 | 76.8  |
| Wine                            | Wine                    |         |       |       |       | 0.6   | 16.9  | 50.0  | 35.5  |
| Basic Food                      | Reporting Unit          | Females |       |       |       |       |       |       |       |
|                                 |                         | 2–3     | 4–8   | 9–11  | 12–13 | 14–18 | 19–49 | 50–69 | 70+   |
| Fruit                           | Raw, edible portion     | 111.0   | 126.8 | 133.6 | 138.9 | 149.8 | 114.8 | 123.4 | 137.0 |
| Vegetables (incl. mushrooms)    | Raw, edible portion     | 46.1    | 54.1  | 80.1  | 88.6  | 103.6 | 116.5 | 118.5 | 110.1 |
| Edible seaweed                  | Dried                   | <0.01   | 0.03  | 0.2   | <0.01 | 0.04  | 0.02  | <0.01 | <0.01 |
| Meat                            | Raw, edible portion     | 29.7    | 34.1  | 50.8  | 63.7  | 71.6  | 67.1  | 66.2  | 64.9  |
| Seafood                         | Raw, edible portion     | 2.4     | 5.0   | 3.4   | 8.0   | 7.0   | 11.6  | 16.8  | 14.6  |
| Dairy products                  | Whole milk equivalent   | 192.9   | 148.3 | 181.1 | 219.9 | 196.0 | 177.3 | 179.9 | 165.5 |
| Eggs                            | Whole egg without shell | 4.9     | 5.9   | 8.8   | 9.2   | 9.5   | 9.9   | 10.0  | 10.5  |
| Grains                          | Whole grain equivalent  | 41.4    | 49.8  | 57.6  | 67.6  | 66.7  | 59.6  | 56.7  | 52.9  |
| Beans, peas and pulses          | Dried                   | 0.6     | 0.8   | 1.6   | 0.8   | 2.4   | 2.2   | 2.8   | 1.4   |
| Nuts and seeds                  | Dried                   | 0.9     | 0.6   | 0.9   | 1.2   | 1.4   | 2.8   | 4.0   | 2.4   |
| Sugar                           | Refined                 | 12.1    | 16.0  | 20.4  | 25.3  | 25.1  | 18.7  | 15.5  | 16.3  |
| Cocoa                           | Dried bean equivalent   | 1.0     | 1.4   | 2.1   | 2.4   | 3.0   | 1.7   | 1.6   | 1.1   |
| Vegetable oil (incl. margarine) | Refined oil             | 6.0     | 7.5   | 10.5  | 12.2  | 12.5  | 11.2  | 10.8  | 10.2  |
| Butter and ghee                 | Butter                  | 0.9     | 1.4   | 2.5   | 3.4   | 2.6   | 2.0   | 1.9   | 2.0   |
| Beer                            | Beer                    |         |       |       |       | <0.01 | 12.6  | 10.2  | 8.0   |
| Wine                            | Wine                    |         |       |       |       | 0.1   | 25.9  | 49.2  | 28.5  |

\* Basic foods are expressed as raw food equivalents (edible portion only), with cooking and processing factors applied where necessary.
